# Supplementary material for: Ultrasensitive plasmonic biosensors based on halloysite nanotubes/MoS2/black phosphorus hybrid architectures
Source: Royal Society of Chemistry journal article supplement (doi:10.1039/c9tc00271e), 2019-01-01
Supplement: c9tc00271e1.pdf [file c9tc00271e1.pdf]

## **Ultrasensitive plasmonic biosensors based on halloysite nanotubes/MoS<sub>2</sub>/black phosphorus hybrid architectures**

Guang Yi Jia,<sup>\*a</sup> Zhen Xian Huang,<sup>a</sup> Yong Liang Zhang,<sup>b</sup> Zhi Qiang Hao<sup>a</sup> and Ya Li Tian<sup>a</sup>

<sup>a</sup>School of Science, Tianjin University of Commerce, Tianjin 300134, PR China.

<sup>b</sup>Department of Applied Physics, The Hong Kong Polytechnic University, Hong Kong, PR China.

\*Email addresses: [gyjia87@163.com](mailto:gyjia87@163.com)

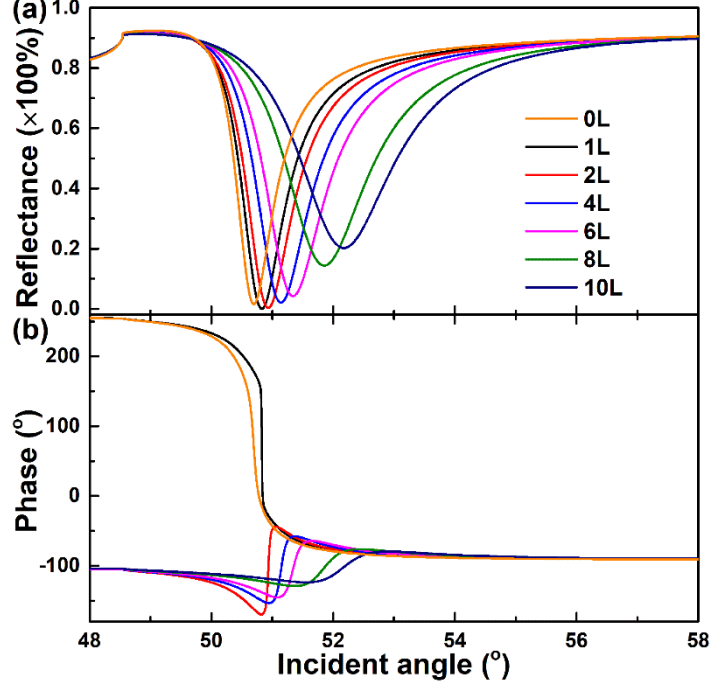

**Fig. S1** Variations of (a) reflectance and (b) phase with respect to the incident angle by changing the layer number of MoS<sub>2</sub> film. The refractive index of initial calibration biosensing medium is  $n_s = 1.333$  RIU. Layer number of BP, thicknesses of HNTs and gold films are 3L, 400 and 40 nm, respectively.

### Transfer matrix method for calculating the decay curve of evanescent field

Within this framework of transfer matrix method,<sup>1,2</sup> it is assumed that there are two perpendicular magnetic field components with amplitudes  $B_{j\text{up}}$  and  $B_{j\text{down}}$  to propagate up (positive  $z$ ) and down (negative  $z$ ) in the  $j$ th medium, respectively. In the semi-infinite materials there is only one wave going in positive  $z$  after the  $N+1$  boundary and negative  $z$  before the first boundary. Then the boundary conditions of the electromagnetic field can be described via using a matrix form as  $AB = 0$  where

$$A = \begin{pmatrix} -1 & e^{-ik_{z1}d_1} & e^{ik_{z1}d_1} & 0 & \dots & \dots & 0 \\ 0 & -1 & -1 & e^{-ik_{z2}d_2} & e^{ik_{z2}d_2} & 0 & \dots & 0 \\ \dots & \dots \\ 0 & 0 & 0 & \dots & 0 & -1 & -1 & 1 \\ \frac{k_{z0}}{n_0^2} & -\frac{k_{z1}}{\eta_1^2} e^{-ik_{z1}d_1} & \frac{k_{z1}}{\eta_1^2} e^{ik_{z1}d_1} & 0 & \dots & \dots & \dots & 0 \\ 0 & \frac{k_{z1}}{\eta_1^2} & -\frac{k_{z1}}{\eta_1^2} & -\frac{k_{z2}}{\eta_2^2} e^{-ik_{z2}d_2} & \frac{k_{z2}}{\eta_2^2} e^{ik_{z2}d_2} & 0 & \dots & 0 \\ \dots & \dots \\ 0 & 0 & 0 & \dots & 0 & \frac{k_{zN}}{\eta_N^2} & -\frac{k_{zN}}{\eta_N^2} & \frac{k_{zN+1}}{n_{N+1}^2} \end{pmatrix} \quad (1)$$

$$B = \begin{pmatrix} B_{0\text{up}} \\ B_{1\text{up}} \\ B_{1\text{down}} \\ B_{2\text{up}} \\ \vdots \\ B_{N-1\text{down}} \\ B_{N\text{up}} \\ B_{N\text{down}} \\ B_{N+1\text{down}} \end{pmatrix} \quad (2)$$

In the above expressions,  $A$  is a  $(2N+2) \times (2N+2)$  matrix and  $B$  is a vector of length  $(2N+2)$ . The complex wave vector  $k_j$  holds the momentum conservation  $k_j^2 = k_x^2 + k_{zj}^2$  where  $k_x$  is the tangential component (along the surface) for all materials and  $k_{zj}$  is the perpendicular component varying dependent on the  $j$ th material. The eigen mode of the system occurs when the determinant of the matrix  $A$  equals 0 with a nonzero vector  $B$ . Then it is possible to solve the real and imaginary parts of  $k_x$  for each frequency of interested plasmonic surface wave.

Once the  $k_x$  value is found, the corresponding field coefficients can be solved by using the same equations. The overall field amplitude is arbitrary, so one can assign a value to one coefficient, such as  $B_{0\text{up}} = 1$ , and get a new system of equations  $A_2 B_2 = C$ , with  $A_2$  of size  $(2N+2) \times (2N+1)$ ,  $B_2$  of length  $(2N+1)$  in length and  $C$  of length  $(2N+2)$ . The new matrix  $A_2$  becomes

$$A_2 = \begin{pmatrix} e^{-ik_{z1}d_1} & e^{ik_{z1}d_1} & 0 & \dots & 0 \\ -1 & -1 & e^{-ik_{z2}d_2} & e^{ik_{z2}d_2} & 0 & \dots & 0 \\ \dots & & & & & & \dots \\ 0 & 0 & \dots & 0 & -1 & -1 & 1 \\ -\frac{k_{z1}}{\eta_1^2} e^{-ik_{z1}d_1} & \frac{k_{z1}}{\eta_1^2} e^{ik_{z1}d_1} & 0 & \dots & 0 \\ \frac{k_{z1}}{\eta_1^2} & -\frac{k_{z1}}{\eta_1^2} & -\frac{k_{z2}}{\eta_2^2} e^{-ik_{z2}d_2} & \frac{k_{z2}}{\eta_2^2} e^{ik_{z2}d_2} & 0 & \dots & 0 \\ \dots & & & & & & \dots \\ 0 & 0 & \dots & 0 & \frac{k_{zN}}{\eta_N^2} & -\frac{k_{zN}}{\eta_N^2} & \frac{k_{zN+1}}{\eta_{N+1}^2} \end{pmatrix} \quad (3)$$

Then the vectors  $B_2$  and  $C$  become

$$B_2 = \begin{pmatrix} B_{1\text{up}} \\ B_{1\text{down}} \\ B_{2\text{up}} \\ \vdots \\ B_{N-1\text{down}} \\ B_{N\text{up}} \\ B_{N\text{down}} \\ B_{N+1\text{down}} \end{pmatrix}, \quad C = \begin{pmatrix} 1 \\ 0 \\ \vdots \\ -\frac{k_{z0}}{\eta_0^2} \\ 0 \\ \vdots \\ 0 \end{pmatrix} \quad (4)$$

This system will be overdetermined since there is one more equation than parameters to solve for. The overdetermined system can be solved by the least squares formula

$$B_2 = [A_2' A_2]^{-1} A_2' C \quad (5)$$

Thus, the field coefficients can be obtained for the p-polarized excitation light. This means that one can plot the electric field  $E$  against  $z$  within each material with

$$E_z(x, y) = -\frac{k_{xj}}{\eta_j^2} B_{j\text{up}} e^{i[k_{zj}[z-Z_j]+k_{xj}x]} + \frac{k_x}{\eta_j^2} B_{j\text{down}} e^{-i[k_{zj}[z-Z_j]+k_{xj}x]} \quad (6)$$

$$E_x(x, y) = \frac{k_{zj}}{\eta_j^2} B_{j\text{up}} e^{i[k_{zj}[z-Z_j]+k_{xj}x]} - \frac{k_z}{\eta_j^2} B_{j\text{down}} e^{-i[k_{zj}[z-Z_j]+k_{xj}x]} \quad (7)$$

Here  $Z_j$  is simply the reference  $z$  coordinate at the interface of the  $(j-1)$ th and  $j$ th media.

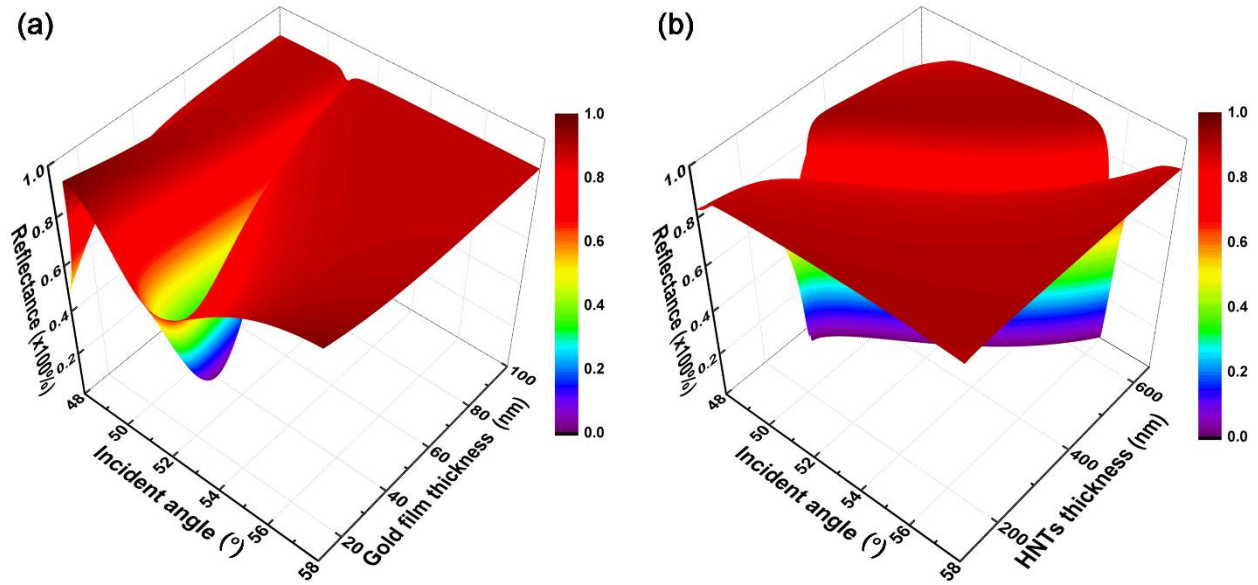

**Fig. S2** Reflectance spectra of the proposed biosensors with the configuration of HNTs/1L MoS<sub>2</sub>/3L BP/Au/prism. The refractive index of biosensing medium is set as  $n_s = 1.333$  RIU. The thickness of HNTs in (a) is 400 nm. The thickness of gold film in (b) is 40 nm.

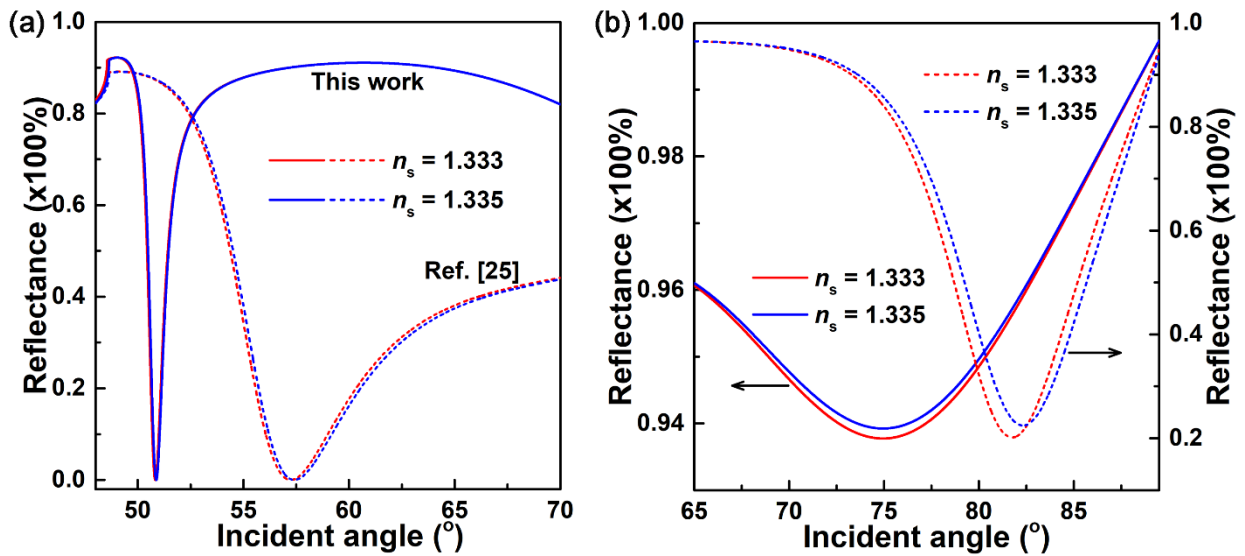

**Fig. S3** (a) Reflectance spectra of biosensors proposed by us (solid lines, corresponding to the structure of 400 nm HNTs/1L MoS<sub>2</sub>/3L BP/40 nm Au/SF11 prism) and Ref. [25] (dashed lines, corresponding to the structure of 1L Graphene/4L BP/48 nm Au/100 nm BK7/SF11 prism). (b) Reflectance spectra of the biosensor configuration of 2L WSe<sub>2</sub>/5 nm BP/50 nm Ag/BK7 prism. The solid lines are calculated by considering the optical anisotropy and polarization dependent refractive index of BP. The dashed lines are calculated by using the fixed refractive index  $n_{BP} = 3.5 + 0.01i$  which is utilized by the authors in Ref. [23].

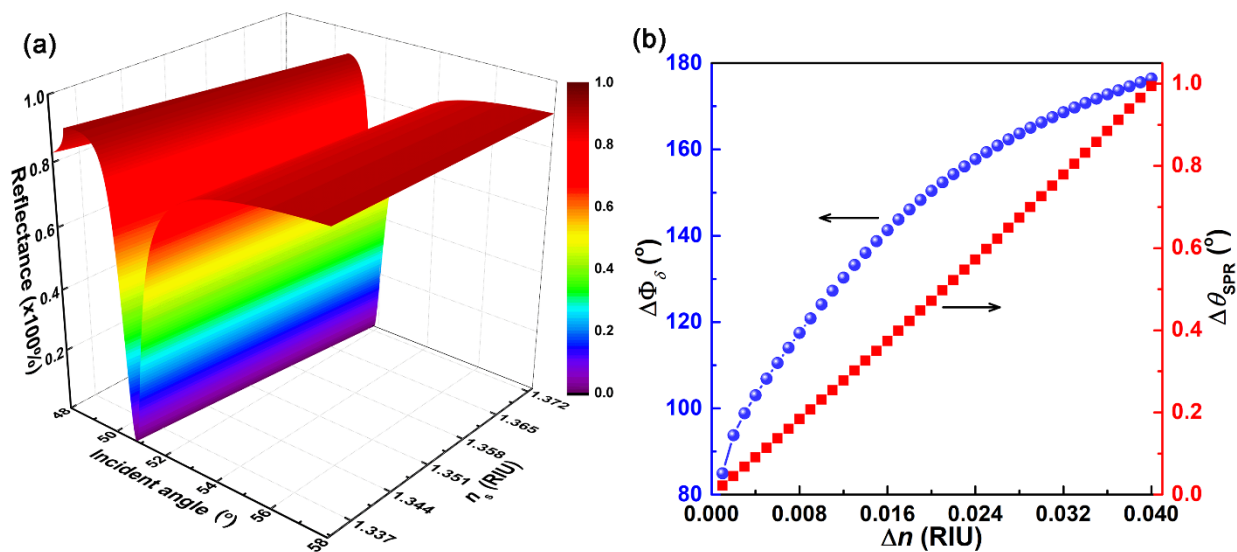

**Fig. S4** (a) Variation of reflectance spectra with respect to the refractive index  $n_s$  of biosensing medium. (b) The change of phase difference  $\Delta\Phi_\delta$  and the change of SPR angle  $\Delta\theta_{\text{SPR}}$  at different refractive-index variates  $\Delta n$ . The refractive index of initial calibration biosensing medium is set as  $n_s = 1.333$  RIU.

## References

- 1 G. Y. Jia, Q. Zhang, Z. X. Huang, S. B. Huang and J. Xu, *Phys. Chem. Chem. Phys.*, 2017, **19**, 27259–27265.
- 2 A. B. Dahlin, M. Mapar, K. Xiong, F. Mazzotta, F. Höök and T. Sannomiya, *Adv. Optical Mater.*, 2014, **2**, 556–564.
